# Supplementary material
Source: publisher figshare collection journal article supplement (https://karger.figshare.com/articles/dataset/_/12248801)
Supplement: Supplementary file 1 [file 1]

### APPENDIX 13

Six-Factor Loading Pattern for the Modified PID5BF+ in a U.S. mixed sample (Keeley et al., 2014)

|                                   | Negative<br>Affectivity | Detachment  | Antagonism  | Disinhibition | Anankastia  | Psychoticism |
|-----------------------------------|-------------------------|-------------|-------------|---------------|-------------|--------------|
| Emotional lability                | <b>0.65</b>             | 0.05        | 0.01        | 0.13          | 0.03        | 0.04         |
| Anxiousness                       | <b>0.62</b>             | 0.17        | -0.03       | -0.05         | 0.18        | 0.07         |
| Separation Insecurity             | <b>0.58</b>             | -0.03       | 0.08        | 0.09          | 0.03        | 0.04         |
| Withdrawal                        | 0.04                    | <b>0.81</b> | 0.00        | 0.03          | 0.01        | 0.09         |
| Anhedonia                         | 0.07                    | <b>0.53</b> | 0.15        | 0.13          | -0.01       | 0.08         |
| Intimacy Avoidance                | -0.10                   | <b>0.34</b> | 0.02        | 0.42          | 0.08        | -0.02        |
| Manipulativeness                  | -0.07                   | 0.08        | <b>0.69</b> | 0.13          | -0.03       | 0.07         |
| Deceitfulness                     | 0.13                    | 0.00        | <b>0.62</b> | 0.05          | 0.03        | 0.08         |
| Grandiosity                       | 0.00                    | 0.10        | <b>0.51</b> | 0.16          | 0.15        | 0.01         |
| Irresponsibility                  | 0.11                    | 0.13        | 0.16        | <b>0.52</b>   | -0.06       | 0.03         |
| Impulsivity                       | 0.07                    | -0.08       | 0.12        | <b>0.39</b>   | -0.05       | 0.25         |
| Distractibility                   | 0.30                    | -0.08       | 0.02        | <b>0.16</b>   | -0.01       | 0.33         |
| Perfectionism                     | 0.11                    | 0.01        | 0.04        | 0.08          | <b>0.78</b> | 0.04         |
| Rigidity                          | 0.04                    | 0.09        | 0.13        | -0.13         | <b>0.72</b> | 0.07         |
| Orderliness                       | 0.07                    | 0.04        | -0.05       | 0.07          | <b>0.76</b> | 0.05         |
| Unusual Beliefs                   | 0.00                    | 0.12        | 0.16        | 0.08          | 0.07        | <b>0.55</b>  |
| Eccentricity                      | 0.02                    | 0.11        | 0.00        | 0.05          | 0.03        | <b>0.76</b>  |
| Perceptual Dysreg.                | 0.03                    | 0.11        | 0.06        | 0.37          | 0.08        | <b>0.27</b>  |
| <b>Latent domain correlations</b> |                         |             |             |               |             |              |
| Negative affectivity              | -                       |             |             |               |             |              |
| Detachment                        | <b>0.15</b>             | -           |             |               |             |              |
| Antagonism                        | <b>0.13</b>             | <b>0.25</b> | -           |               |             |              |
| Disinhibition                     | <b>0.25</b>             | <b>0.38</b> | <b>0.45</b> | -             |             |              |
| Anankastia                        | <b>0.27</b>             | <b>0.20</b> | <b>0.15</b> | <b>0.06</b>   | -           |              |
| Psychoticism                      | <b>0.29</b>             | <b>0.31</b> | <b>0.30</b> | <b>0.19</b>   | <b>0.43</b> | -            |

Note.  $N = 1,024$ ; Expected primary loadings are boldfaced. The matrix at the bottom shows inter-domain correlations, where bolded coefficients are significant at the 0.05 level.

### APPENDIX 13

The Modified PID5BF+ scale score characteristics for a U.S. mixed sample (Keeley et al., 2014)

|                       | Patients (n = 80) |      |      | Students (n = 944) |      |
|-----------------------|-------------------|------|------|--------------------|------|
|                       | $\rho$            | M    | SD   | M                  | SD   |
| Emotional lability    | 0.80              | 2.64 | 2.06 | 1.93               | 1.73 |
| Anxiousness           | 0.94              | 2.83 | 2.16 | 2.60               | 2.07 |
| Separation Insecurity | 0.72              | 2.24 | 1.85 | 1.92               | 1.64 |
| Withdrawal            | 0.77              | 2.62 | 1.80 | 1.34               | 1.40 |
| Anhedonia             | 0.75              | 2.63 | 1.78 | 1.16               | 1.36 |
| Intimacy Avoidance    | 0.75              | 2.38 | 1.85 | 1.05               | 1.37 |
| Manipulativeness      | 0.79              | 2.11 | 1.85 | 1.18               | 1.43 |
| Deceitfulness         | 0.74              | 2.29 | 1.89 | 1.93               | 1.56 |
| Grandiosity           | 0.77              | 2.33 | 1.95 | 1.02               | 1.30 |
| Irresponsibility      | 0.74              | 2.37 | 1.78 | 0.79               | 1.15 |
| Impulsivity           | 0.76              | 2.83 | 1.82 | 1.65               | 1.42 |
| Distractibility       | 0.75              | 3.03 | 1.72 | 3.01               | 1.67 |
| Perfectionism         | 0.83              | 2.96 | 1.96 | 1.97               | 1.76 |
| Rigidity              | 0.77              | 3.06 | 1.83 | 2.65               | 1.66 |
| Orderliness           | 0.77              | 2.59 | 1.81 | 1.97               | 1.69 |
| Unusual Beliefs       | 0.78              | 2.54 | 1.95 | 1.75               | 1.66 |
| Eccentricity          | 0.78              | 2.49 | 2.00 | 1.94               | 1.69 |
| Perceptual Dysreg.    | 0.77              | 2.00 | 1.87 | 0.98               | 1.27 |
|                       |                   | M    | SD   | M                  | SD   |
| Negative affectivity  | -                 | 2.57 | 1.82 | 2.15               | 1.45 |
| Detachment            | -                 | 2.53 | 1.62 | 1.19               | 1.08 |
| Antagonism            | -                 | 2.29 | 1.78 | 1.37               | 1.14 |
| Disinhibition         | -                 | 2.75 | 1.51 | 1.83               | 1.06 |
| Anankastia            | -                 | 2.88 | 1.66 | 2.20               | 1.48 |
| Psychoticism          | -                 | 2.36 | 1.75 | 1.56               | 1.25 |

Note.  $\rho$  = polychoric correlation coefficient; M = mean; SD = standard deviation.

### APPENDIX 13

Six-Factor Loading Pattern for the Modified PID5BF+ in a U.S. Student sample (Wright et al., 2012)

|                                   | Negative<br>Affectivity | Detachment  | Antagonism  | Disinhibition | Anankastia  | Psychoticism |
|-----------------------------------|-------------------------|-------------|-------------|---------------|-------------|--------------|
| Emotional lability                | <b>0.58</b>             | -0.03       | 0.03        | 0.08          | 0.12        | 0.09         |
| Anxiousness                       | <b>0.65</b>             | 0.23        | -0.02       | -0.04         | 0.15        | 0.01         |
| Separation Insecurity             | <b>0.55</b>             | -0.01       | 0.05        | 0.17          | 0.05        | 0.00         |
| Withdrawal                        | 0.03                    | <b>0.81</b> | 0.04        | 0.01          | 0.02        | 0.10         |
| Anhedonia                         | 0.14                    | <b>0.57</b> | 0.05        | 0.19          | -0.04       | 0.04         |
| Intimacy Avoidance                | -0.09                   | <b>0.40</b> | 0.07        | 0.18          | 0.05        | 0.08         |
| Manipulativeness                  | -0.15                   | 0.08        | <b>0.61</b> | 0.16          | 0.09        | 0.08         |
| Deceitfulness                     | 0.11                    | 0.01        | <b>0.82</b> | 0.00          | -0.04       | 0.05         |
| Grandiosity                       | -0.08                   | 0.08        | <b>0.40</b> | 0.23          | 0.21        | 0.02         |
| Irresponsibility                  | 0.02                    | 0.12        | 0.05        | <b>0.69</b>   | -0.02       | 0.01         |
| Impulsivity                       | 0.11                    | -0.11       | 0.18        | <b>0.40</b>   | -0.09       | 0.20         |
| Distractibility                   | 0.33                    | -0.03       | 0.08        | <b>0.23</b>   | -0.09       | 0.24         |
| Perfectionism                     | 0.07                    | 0.05        | 0.01        | 0.10          | <b>0.78</b> | 0.02         |
| Rigidity                          | 0.10                    | 0.04        | 0.15        | -0.16         | <b>0.67</b> | 0.08         |
| Orderliness                       | 0.11                    | 0.01        | 0.01        | -0.02         | <b>0.72</b> | 0.06         |
| Unusual Beliefs                   | -0.02                   | 0.11        | 0.10        | 0.02          | 0.06        | <b>0.68</b>  |
| Eccentricity                      | 0.08                    | 0.05        | 0.03        | 0.07          | 0.00        | <b>0.67</b>  |
| Perceptual Dysreg.                | -0.05                   | 0.13        | 0.04        | 0.25          | 0.11        | <b>0.41</b>  |
| <b>Latent domain correlations</b> |                         |             |             |               |             |              |
| Negative affectivity              | -                       |             |             |               |             |              |
| Detachment                        | <b>0.14</b>             | -           |             |               |             |              |
| Antagonism                        | <b>0.07</b>             | <b>0.20</b> | -           |               |             |              |
| Disinhibition                     | <b>0.20</b>             | <b>0.32</b> | <b>0.39</b> | -             |             |              |
| Anankastia                        | <b>0.25</b>             | <b>0.18</b> | <b>0.20</b> | 0.00          | -           |              |
| Psychoticism                      | <b>0.19</b>             | <b>0.29</b> | <b>0.32</b> | <b>0.40</b>   | <b>0.17</b> | -            |

Note.  $N = 1,826$ ; Expected primary loadings are boldfaced. The matrix at the bottom shows inter-domain correlations, where bolded coefficients are significant at the 0.05 level.

### APPENDIX 13

The Modified PID5BF+ scale score characteristics for U.S. Students (Wright et al., 2012)

| Students (n = 1,826)  |        |      |      |
|-----------------------|--------|------|------|
|                       | $\rho$ | M    | SD   |
| Emotional lability    | 0.81   | 2.30 | 1.72 |
| Anxiousness           | 0.93   | 2.63 | 1.90 |
| Separation Insecurity | 0.65   | 2.17 | 1.55 |
| Withdrawal            | 0.77   | 1.32 | 1.39 |
| Anhedonia             | 0.82   | 1.30 | 1.45 |
| Intimacy Avoidance    | 0.74   | 1.22 | 1.41 |
| Manipulativeness      | 0.81   | 1.57 | 1.52 |
| Deceitfulness         | 0.79   | 2.40 | 1.54 |
| Grandiosity           | 0.74   | 1.31 | 1.35 |
| Irresponsibility      | 0.69   | 1.07 | 1.25 |
| Impulsivity           | 0.77   | 1.87 | 1.46 |
| Distractibility       | 0.73   | 3.04 | 1.55 |
| Perfectionism         | 0.82   | 2.04 | 1.61 |
| Rigidity              | 0.78   | 2.69 | 1.54 |
| Orderliness           | 0.80   | 1.94 | 1.59 |
| Unusual Beliefs       | 0.75   | 1.93 | 1.65 |
| Eccentricity          | 0.80   | 2.15 | 1.68 |
| Perceptual Dysreg.    | 0.83   | 1.05 | 1.37 |
|                       |        | M    | SD   |
| Negative affectivity  | -      | 2.37 | 1.38 |
| Detachment            | -      | 1.28 | 1.13 |
| Antagonism            | -      | 1.77 | 1.21 |
| Disinhibition         | -      | 2.01 | 1.10 |
| Anankastia            | -      | 2.22 | 1.36 |
| Psychoticism          | -      | 1.70 | 1.29 |

Note.  $\rho$  = polychoric correlation coefficient;  $\alpha$  = alpha coefficient; M = mean; SD = standard deviation.
