# Supplementary material
Source: publisher figshare collection journal article supplement (https://karger.figshare.com/articles/dataset/_/12248801)
Supplement: Supplementary file 2 [file 1]

## APPENDIX 8

Six-Factor Loading Pattern for the Modified PID5BF+ in an Italian Community Sample

|                                   | Negative<br>Affectivity | Detachment  | Antagonism  | Disinhibition | Anankastia  | Psychoticism |
|-----------------------------------|-------------------------|-------------|-------------|---------------|-------------|--------------|
| Emotional lability                | <b>0.68</b>             | -0.04       | 0.01        | 0.08          | 0.01        | 0.15         |
| Anxiousness                       | <b>0.62</b>             | 0.16        | -0.03       | 0.05          | 0.12        | -0.04        |
| Separation Insecurity             | <b>0.42</b>             | 0.06        | 0.12        | 0.17          | 0.06        | 0.01         |
| Withdrawal                        | 0.07                    | <b>0.63</b> | 0.03        | -0.03         | 0.02        | 0.15         |
| Anhedonia                         | 0.10                    | <b>0.59</b> | 0.12        | 0.11          | 0.00        | -0.02        |
| Intimacy Avoidance                | -0.05                   | <b>0.47</b> | 0.01        | 0.09          | 0.11        | 0.03         |
| Manipulativeness                  | -0.04                   | 0.06        | <b>0.67</b> | 0.04          | -0.07       | 0.15         |
| Deceitfulness                     | 0.06                    | 0.04        | <b>0.68</b> | 0.09          | 0.08        | 0.04         |
| Grandiosity                       | 0.06                    | 0.11        | <b>0.42</b> | 0.03          | 0.21        | 0.10         |
| Irresponsibility                  | 0.02                    | 0.19        | 0.21        | <b>0.36</b>   | -0.09       | 0.13         |
| Impulsivity                       | 0.07                    | -0.11       | 0.15        | <b>0.47</b>   | 0.06        | 0.14         |
| Distractibility                   | 0.11                    | 0.05        | -0.04       | <b>0.62</b>   | -0.02       | 0.08         |
| Perfectionism                     | 0.08                    | 0.07        | 0.02        | 0.04          | <b>0.75</b> | 0.09         |
| Rigidity                          | 0.03                    | -0.04       | 0.05        | -0.23         | <b>0.58</b> | 0.02         |
| Orderliness                       | 0.13                    | 0.04        | 0.03        | 0.10          | <b>0.56</b> | 0.01         |
| Unusual Beliefs                   | 0.13                    | 0.01        | 0.10        | 0.05          | 0.05        | <b>0.61</b>  |
| Eccentricity                      | -0.02                   | 0.07        | 0.10        | 0.15          | 0.02        | <b>0.61</b>  |
| Perceptual Dysreg.                | 0.07                    | 0.13        | -0.01       | 0.15          | 0.08        | <b>0.40</b>  |
| <b>Latent domain correlations</b> |                         |             |             |               |             |              |
| Negative affectivity              | -                       |             |             |               |             |              |
| Detachment                        | <b>0.24</b>             | -           |             |               |             |              |
| Antagonism                        | <b>0.15</b>             | <b>0.26</b> | -           |               |             |              |
| Disinhibition                     | <b>0.37</b>             | <b>0.26</b> | <b>0.33</b> | -             |             |              |
| Anankastia                        | <b>0.32</b>             | <b>0.16</b> | <b>0.17</b> | 0.01          | -           |              |
| Psychoticism                      | <b>0.25</b>             | <b>0.27</b> | <b>0.40</b> | <b>0.19</b>   | <b>0.45</b> | -            |

Note.  $N = 1,965$ ; Expected primary loadings are boldfaced. The matrix at the bottom shows inter-domain correlations, where bolded coefficients are significant at the 0.05 level.

## APPENDIX 8

The Modified PID5BF+ scale score characteristics for an Italian community sample

| Community (n = 1,965) |        |      |      |
|-----------------------|--------|------|------|
|                       | $\rho$ | M    | SD   |
| Emotional lability    | 0.71   | 2.05 | 1.58 |
| Anxiousness           | 0.90   | 2.22 | 1.75 |
| Separation Insecurity | 0.74   | 1.25 | 1.39 |
| Withdrawal            | 0.74   | 0.87 | 1.18 |
| Anhedonia             | 0.74   | 1.12 | 1.30 |
| Intimacy Avoidance    | 0.60   | 1.15 | 1.33 |
| Manipulativeness      | 0.85   | 0.72 | 1.18 |
| Deceitfulness         | 0.68   | 1.28 | 1.37 |
| Grandiosity           | 0.65   | 1.27 | 1.39 |
| Irresponsibility      | 0.64   | 0.86 | 1.09 |
| Impulsivity           | 0.78   | 1.63 | 1.52 |
| Distractibility       | 0.72   | 2.13 | 1.56 |
| Perfectionism         | 0.81   | 1.75 | 1.61 |
| Rigidity              | 0.65   | 3.64 | 1.43 |
| Orderliness           | 0.59   | 1.74 | 1.48 |
| Unusual Beliefs       | 0.79   | 1.33 | 1.53 |
| Eccentricity          | 0.84   | 1.27 | 1.51 |
| Perceptual Dysreg.    | 0.72   | 0.91 | 1.25 |
|                       |        | M    | SD   |
| Negative affectivity  | -      | 1.84 | 1.25 |
| Detachment            | -      | 1.05 | 0.98 |
| Antagonism            | -      | 1.09 | 1.06 |
| Disinhibition         | -      | 1.54 | 1.07 |
| Anankastia            | -      | 2.38 | 1.20 |
| Psychoticism          | -      | 1.17 | 1.16 |

Note.  $\rho$  = polychoric correlation coefficient;  $\alpha$  = alpha coefficient; M = mean; SD = standard deviation.
