# Supplementary material
Source: publisher figshare collection journal article supplement (https://karger.figshare.com/articles/dataset/_/12248801)
Supplement: Supplementary file 3 [file 1]

## APPENDIX 6

Six-Factor Loading Pattern for the Modified PID5BF+ in Dutch-speaking (Belgium) mixed sample

|                                   | Negative<br>Affectivity | Detachment  | Antagonism  | Disinhibition | Anankastia  | Psychoticism |
|-----------------------------------|-------------------------|-------------|-------------|---------------|-------------|--------------|
| Emotional lability                | <b>0.51</b>             | -0.08       | -0.08       | 0.25          | 0.14        | 0.09         |
| Anxiousness                       | <b>0.82</b>             | 0.12        | -0.02       | 0.02          | 0.05        | 0.04         |
| Separation Insecurity             | <b>0.46</b>             | 0.00        | 0.08        | 0.17          | 0.13        | 0.09         |
| Withdrawal                        | 0.04                    | <b>0.78</b> | 0.03        | 0.01          | 0.09        | 0.05         |
| Anhedonia                         | 0.26                    | <b>0.55</b> | 0.07        | 0.04          | -0.10       | 0.10         |
| Intimacy Avoidance                | -0.02                   | <b>0.54</b> | -0.03       | 0.09          | 0.11        | 0.05         |
| Manipulativeness                  | -0.07                   | -0.01       | <b>0.74</b> | 0.08          | 0.02        | 0.07         |
| Deceitfulness                     | 0.03                    | 0.05        | <b>0.74</b> | 0.12          | 0.04        | 0.02         |
| Grandiosity                       | 0.04                    | 0.07        | <b>0.46</b> | -0.07         | 0.09        | 0.22         |
| Irresponsibility                  | 0.06                    | 0.12        | 0.20        | <b>0.47</b>   | -0.13       | 0.05         |
| Impulsivity                       | 0.07                    | -0.03       | 0.06        | <b>0.70</b>   | 0.03        | 0.08         |
| Distractibility                   | 0.20                    | 0.18        | 0.04        | <b>0.47</b>   | 0.01        | 0.06         |
| Perfectionism                     | 0.05                    | 0.05        | -0.06       | 0.07          | <b>0.77</b> | 0.00         |
| Rigidity                          | 0.09                    | 0.05        | 0.14        | -0.12         | <b>0.68</b> | 0.05         |
| Orderliness                       | 0.09                    | 0.01        | 0.09        | 0.07          | <b>0.48</b> | 0.14         |
| Unusual Beliefs                   | 0.04                    | -0.01       | -0.01       | 0.00          | 0.01        | <b>0.92</b>  |
| Eccentricity                      | 0.03                    | 0.20        | 0.18        | 0.16          | 0.04        | <b>0.43</b>  |
| Perceptual Dysreg.                | -0.04                   | 0.10        | 0.06        | 0.17          | 0.07        | <b>0.35</b>  |
| <b>Latent domain correlations</b> |                         |             |             |               |             |              |
| Negative affectivity              | -                       |             |             |               |             |              |
| Detachment                        | <b>0.29</b>             | -           |             |               |             |              |
| Antagonism                        | 0.05                    | 0.20        | -           |               |             |              |
| Disinhibition                     | <b>0.41</b>             | <b>0.25</b> | <b>0.29</b> | -             |             |              |
| Anankastia                        | <b>0.29</b>             | <b>0.15</b> | <b>0.16</b> | 0.07          | -           |              |
| Psychoticism                      | <b>0.26</b>             | <b>0.30</b> | <b>0.33</b> | <b>0.34</b>   | <b>0.22</b> | -            |

Note.  $N = 712$ ; Expected primary loadings are boldfaced. The matrix at the bottom shows inter-domain correlations, where bolded coefficients are significant at the 0.05 level.

## APPENDIX 6

### Modified PID5BF+ scales characteristics for Dutch-speaking (Belgium) mixed sample

|                       | Patients (n = 234) |      |      | Community (n = 478) |      |
|-----------------------|--------------------|------|------|---------------------|------|
|                       | $\rho$             | M    | SD   | M                   | SD   |
| Emotional lability    | 0.81               | 3.34 | 1.86 | 2.03                | 1.53 |
| Anxiousness           | 0.93               | 3.77 | 1.85 | 1.98                | 1.68 |
| Separation Insecurity | 0.73               | 2.54 | 1.71 | 1.27                | 1.25 |
| Withdrawal            | 0.79               | 2.39 | 1.51 | 0.96                | 1.23 |
| Anhedonia             | 0.82               | 2.74 | 1.78 | 0.99                | 1.10 |
| Intimacy Avoidance    | 0.71               | 1.58 | 1.59 | 0.73                | 1.12 |
| Manipulativeness      | 0.84               | 1.66 | 1.52 | 1.26                | 1.35 |
| Deceitfulness         | 0.74               | 2.11 | 1.53 | 1.61                | 1.39 |
| Grandiosity           | 0.74               | 1.12 | 1.30 | 0.67                | 0.98 |
| Irresponsibility      | 0.62               | 1.73 | 1.57 | 0.92                | 1.11 |
| Impulsivity           | 0.77               | 2.52 | 1.77 | 1.58                | 1.28 |
| Distractibility       | 0.78               | 3.49 | 1.62 | 1.89                | 1.41 |
| Perfectionism         | 0.85               | 2.71 | 1.89 | 2.01                | 1.59 |
| Rigidity              | 0.77               | 3.06 | 1.53 | 2.61                | 1.56 |
| Orderliness           | 0.64               | 1.65 | 1.55 | 1.19                | 1.24 |
| Unusual Beliefs       | 0.80               | 1.99 | 1.85 | 0.94                | 1.32 |
| Eccentricity          | 0.84               | 2.07 | 1.67 | 0.87                | 1.29 |
| Perceptual Dysreg.    | 0.73               | 0.68 | 1.12 | 0.38                | 0.74 |
|                       |                    | M    | SD   | M                   | SD   |
| Negative affectivity  | -                  | 3.21 | 1.43 | 1.76                | 1.20 |
| Detachment            | -                  | 2.24 | 1.27 | 0.89                | 0.89 |
| Antagonism            | -                  | 1.63 | 1.20 | 1.18                | 1.02 |
| Disinhibition         | -                  | 2.59 | 1.32 | 1.46                | 0.97 |
| Anankastia            | -                  | 2.47 | 1.38 | 1.93                | 1.18 |
| Psychoticism          | -                  | 1.58 | 1.22 | 0.73                | 0.90 |

Note.  $\rho$  = polychoric correlation coefficient;  $\alpha$  = alpha coefficient; M = mean; SD = standard deviation.
