# Supplementary material
Source: publisher figshare collection journal article supplement (https://karger.figshare.com/articles/dataset/_/12248801)
Supplement: Supplementary file 4 [file 1]

## APPENDIX 9

Six-Factor Loading Pattern for the Modified PID5BF+ in a Norwegian student sample

|                                   | Negative<br>Affectivity | Detachment  | Antagonism  | Disinhibition | Anankastia  | Psychoticism |
|-----------------------------------|-------------------------|-------------|-------------|---------------|-------------|--------------|
| Emotional lability                | <b>0.66</b>             | -0.13       | -0.02       | 0.08          | 0.07        | 0.04         |
| Anxiousness                       | <b>0.69</b>             | 0.15        | -0.01       | 0.02          | 0.10        | 0.03         |
| Separation Insecurity             | <b>0.55</b>             | 0.10        | 0.01        | 0.13          | 0.01        | -0.04        |
| Withdrawal                        | 0.04                    | <b>0.64</b> | 0.07        | -0.10         | 0.11        | 0.15         |
| Anhedonia                         | 0.04                    | <b>0.72</b> | 0.00        | 0.22          | -0.02       | -0.03        |
| Intimacy Avoidance                | 0.00                    | <b>0.38</b> | 0.13        | -0.07         | 0.04        | 0.23         |
| Manipulativeness                  | -0.02                   | 0.03        | <b>0.82</b> | 0.04          | -0.03       | 0.05         |
| Deceitfulness                     | 0.00                    | 0.03        | <b>0.62</b> | 0.11          | 0.10        | 0.05         |
| Grandiosity                       | 0.00                    | 0.10        | <b>0.42</b> | -0.05         | 0.11        | 0.05         |
| Irresponsibility                  | 0.04                    | 0.04        | 0.16        | <b>0.35</b>   | -0.11       | 0.17         |
| Impulsivity                       | 0.05                    | -0.01       | 0.08        | <b>0.64</b>   | -0.01       | 0.04         |
| Distractibility                   | 0.09                    | 0.12        | -0.03       | <b>0.53</b>   | 0.09        | 0.11         |
| Perfectionism                     | 0.13                    | 0.10        | 0.05        | 0.03          | <b>0.59</b> | 0.04         |
| Rigidity                          | 0.05                    | 0.04        | 0.05        | 0.02          | <b>0.63</b> | 0.10         |
| Orderliness                       | 0.08                    | 0.01        | 0.02        | 0.01          | <b>0.70</b> | 0.04         |
| Unusual Beliefs                   | 0.07                    | -0.02       | 0.10        | 0.11          | 0.03        | <b>0.66</b>  |
| Eccentricity                      | -0.02                   | 0.12        | 0.02        | 0.07          | 0.08        | <b>0.75</b>  |
| Perceptual Dysreg.                | 0.03                    | 0.11        | 0.10        | 0.21          | 0.06        | <b>0.34</b>  |
| <b>Latent domain correlations</b> |                         |             |             |               |             |              |
| Negative affectivity              | -                       |             |             |               |             |              |
| Detachment                        | <b>0.18</b>             | -           |             |               |             |              |
| Antagonism                        | 0.02                    | <b>0.23</b> | -           |               |             |              |
| Disinhibition                     | <b>0.29</b>             | <b>0.20</b> | <b>0.22</b> | -             |             |              |
| Anankastia                        | <b>0.30</b>             | <b>0.23</b> | <b>0.18</b> | 0.07          | -           |              |
| Psychoticism                      | <b>0.12</b>             | <b>0.33</b> | <b>0.32</b> | <b>0.27</b>   | <b>0.35</b> | -            |

Note.  $N = 495$ ; Expected primary loadings are boldfaced. The matrix at the bottom shows inter-domain correlations, where bolded coefficients are significant at the 0.05 level.

## APPENDIX 9

### The Modified PID5BF+ scale score characteristics for a Norwegian student sample

| Students (n = 495)    |        |      |      |
|-----------------------|--------|------|------|
|                       | $\rho$ | M    | SD   |
| Emotional lability    | 0.82   | 2.32 | 1.72 |
| Anxiousness           | 0.91   | 2.28 | 1.77 |
| Separation Insecurity | 0.69   | 1.59 | 1.36 |
| Withdrawal            | 0.80   | 1.60 | 1.57 |
| Anhedonia             | 0.79   | 1.21 | 1.40 |
| Intimacy Avoidance    | 0.79   | 1.17 | 1.46 |
| Manipulativeness      | 0.76   | 1.15 | 1.28 |
| Deceitfulness         | 0.74   | 2.03 | 1.48 |
| Grandiosity           | 0.75   | 0.65 | 1.03 |
| Irresponsibility      | 0.61   | 0.91 | 1.20 |
| Impulsivity           | 0.71   | 1.67 | 1.28 |
| Distractibility       | 0.74   | 2.43 | 1.53 |
| Perfectionism         | 0.87   | 1.40 | 1.48 |
| Rigidity              | 0.78   | 2.26 | 1.55 |
| Orderliness           | 0.64   | 1.79 | 1.50 |
| Unusual Beliefs       | 0.78   | 1.15 | 1.39 |
| Eccentricity          | 0.86   | 1.34 | 1.54 |
| Perceptual Dysreg.    | 0.72   | 0.74 | 1.13 |
|                       |        | M    | SD   |
| Negative affectivity  | -      | 2.06 | 1.30 |
| Detachment            | -      | 1.33 | 1.16 |
| Antagonism            | -      | 1.28 | 1.01 |
| Disinhibition         | -      | 1.67 | 1.01 |
| Anankastia            | -      | 1.81 | 1.24 |
| Psychoticism          | -      | 1.08 | 1.12 |

Note.  $\rho$  = polychoric correlation coefficient; M = mean; SD = standard deviation.
