# Supplementary material
Source: publisher figshare collection journal article supplement (https://karger.figshare.com/articles/dataset/_/12248801)
Supplement: Supplementary file 5 [file 1]

## The Modified Personality Inventory for DSM-5 and ICD-11 – Brief Form Plus (PID5BF+ M)

The PID5BF+ M is short form of the Personality Inventory for DSM-5 (PID-5), augmented with a scoring algorithm to assess the ICD-11 personality trait domain Anankastia. The PID-5 is the official rating scale of the American Psychiatric Association for the assessment of maladaptive personality traits according to criterion B of the alternative model for personality disorders in section III of the DSM-5. Criterion B is an empirically derived and hierarchical model of problematic personality expressions, which is compatible with 4 of the 5 maladaptive trait domains in the ICD-11. The PID5BF+ M is therefore suitable to assess maladaptive personality traits both according to DSM-5 and ICD-11.

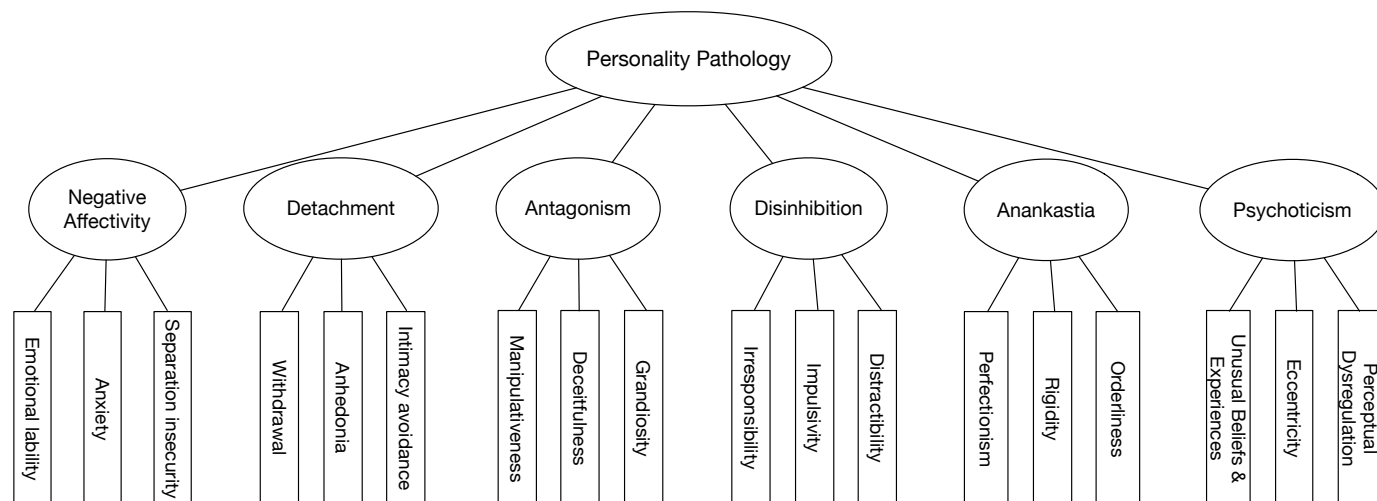

The assessment model comprises 18 trait facets, each consisting of 2 items. Specific trait facets can be combined to yield indices of the six broader trait domains according to the scheme above using the PID-5 items stated in the table below. The scores on the items within each trait facet should be summed, no item needs to be reverse scored. The average domain scores are calculated by averaging the 3 facet scores contributing to a specific domain. Higher average scores indicate greater dysfunction in a specific personality trait facet or domain.

| PID5BF+ M SCORING ALGORITHM | Personality Trait Facet       | PID5BF+ M item number | PID-5 item number | Sum Score Trait Facet | Average Score Trait Domain | Trait Domain         |
|-----------------------------|-------------------------------|-----------------------|-------------------|-----------------------|----------------------------|----------------------|
|                             | Emotional Lability            | 1, 19                 | 62, 122           |                       |                            | Negative Affectivity |
|                             | Anxiety                       | 7, 25                 | 109, 110          |                       |                            |                      |
|                             | Separation Insecurity         | 13, 31                | 50, 64            |                       |                            |                      |
|                             | Withdrawal                    | 4, 22                 | 82, 136           |                       |                            | Detachment           |
|                             | Anhedonia                     | 10, 28                | 23, 189           |                       |                            |                      |
|                             | Intimacy Avoidance            | 16, 34                | 89, 108           |                       |                            |                      |
|                             | Manipulativeness              | 2, 20                 | 162, 219          |                       |                            | Antagonism           |
|                             | Deceitfulness                 | 8, 26                 | 126, 218          |                       |                            |                      |
|                             | Grandiosity                   | 14, 32                | 187, 197          |                       |                            |                      |
|                             | Irresponsibility              | 3, 21                 | 129, 160          |                       |                            | Disinhibition        |
|                             | Impulsivity                   | 9, 27                 | 4, 17             |                       |                            |                      |
|                             | Distractibility               | 15, 33                | 6, 132            |                       |                            |                      |
|                             | Perfectionism                 | 6, 18                 | 123, 176          |                       |                            | Anankastia           |
|                             | Rigidity                      | 12, 24                | 140, 220          |                       |                            |                      |
|                             | Orderliness                   | 30, 36                | 34, 115           |                       |                            |                      |
|                             | Unusual Beliefs & Experiences | 5, 23                 | 194, 209          |                       |                            | Psychoticism         |
|                             | Eccentricity                  | 11, 29                | 25, 185           |                       |                            |                      |
|                             | Perceptual Dysregulation      | 17, 35                | 44, 77            |                       |                            |                      |

The PID5BF+ was developed using ant colony optimization algorithms, validity of the model and of the assessment could be confirmed in large German and English speaking samples<sup>1</sup>. The PID5BF+ M differs only in the definition of the Anankastia domain, validity of this modified version could be ascertained in samples of 15 different countries<sup>2</sup>.

<sup>1</sup> Kerber, A., Schultze, M., Müller, S., Rühling, R. M., Wright, A. G., Spitzer, C., Krueger, R. F., Knaevelsrud, C., Zimmermann, J. (2019). Development of a Short and ICD-11 Compatible Measure for DSM-5 Maladaptive Personality Traits Using Ant Colony Optimization Algorithms. <https://doi.org/10.31234/osf.io/rsw54>

<sup>2</sup> Bach, B., Kerber, A., Aluja, A., Bastiaens, T., Keeley, J., Claes, L., Fossati, A., Gutierrez, F., Oliveira, S. E. S., Pires, R., Riegel, K. D., Rolland, J., Roskam, I., Sellbom, M., Somma, A., Spanemberg, L., Strus, W., Thimm, J., Wright, A.G.C., Zimmermann, J. International Assessment of DSM-5 and ICD-11 Personality Disorder Traits: Toward a Common Nomenclature in DSM-5.1. 2019. DOI: 10.1159/000507589
