# Supplementary material
Source: publisher figshare collection journal article supplement (https://karger.figshare.com/articles/dataset/_/12248801)
Supplement: Supplementary file 6 [file 1]

## APPENDIX 2

Modified PID5BF+ scale characteristics for Germany (Kerber et al., 2019)

|                       | Patients (n = 684) |      |      | Community (n = 587) |      |
|-----------------------|--------------------|------|------|---------------------|------|
|                       | $\rho$             | M    | SD   | M                   | SD   |
| Emotional lability    | 0.86               | 3.22 | 1.80 | 2.75                | 1.84 |
| Anxiousness           | 0.94               | 3.79 | 1.79 | 2.58                | 1.91 |
| Separation Insecurity | 0.80               | 2.71 | 1.76 | 1.84                | 1.54 |
| Withdrawal            | 0.84               | 2.41 | 1.50 | 1.21                | 1.42 |
| Anhedonia             | 0.84               | 2.81 | 1.66 | 1.28                | 1.42 |
| Intimacy Avoidance    | 0.72               | 2.17 | 1.66 | 1.11                | 1.40 |
| Manipulativeness      | 0.79               | 0.76 | 1.16 | 0.86                | 1.14 |
| Deceitfulness         | 0.74               | 1.30 | 1.39 | 1.72                | 1.42 |
| Grandiosity           | 0.71               | 0.88 | 1.11 | 0.98                | 1.15 |
| Irresponsibility      | 0.63               | 1.30 | 1.37 | 1.03                | 1.25 |
| Impulsivity           | 0.75               | 2.40 | 1.61 | 1.78                | 1.38 |
| Distractibility       | 0.75               | 3.30 | 1.57 | 2.44                | 1.47 |
| Perfectionism         | 0.85               | 2.43 | 1.75 | 2.22                | 1.74 |
| Rigidity              | 0.72               | 2.30 | 1.57 | 2.11                | 1.53 |
| Orderliness           | 0.69               | 1.65 | 1.53 | 1.73                | 1.59 |
| Unusual Beliefs       | 0.81               | 1.86 | 1.70 | 1.57                | 1.61 |
| Eccentricity          | 0.81               | 1.91 | 1.59 | 1.58                | 1.66 |
| Perceptual Dysreg.    | 0.86               | 1.12 | 1.46 | 1.13                | 1.45 |
|                       |                    | M    | SD   | M                   | SD   |
| Negative affectivity  | -                  | 3.24 | 1.41 | 2.39                | 1.44 |
| Detachment            | -                  | 2.47 | 1.24 | 1.20                | 1.13 |
| Antagonism            | -                  | 0.98 | 1.00 | 1.19                | 0.97 |
| Disinhibition         | -                  | 2.33 | 1.13 | 1.75                | 1.07 |
| Anankastia            | -                  | 2.13 | 1.37 | 2.02                | 1.38 |
| Psychoticism          | -                  | 1.63 | 1.30 | 1.42                | 1.29 |

Note.  $\rho$  = polychoric correlation coefficient; M = mean; SD = standard deviation.
