# Supplementary material
Source: publisher figshare collection journal article supplement (https://karger.figshare.com/articles/dataset/_/12248801)
Supplement: Supplementary file 7 [file 1]

## APPENDIX 1

### Modified PID5BF+ scale characteristics for Denmark

| Patients (n = 584)    |        |      |      |
|-----------------------|--------|------|------|
|                       | $\rho$ | M    | SD   |
| Emotional lability    | 0.74   | 3.74 | 1.81 |
| Anxiousness           | 0.89   | 4.23 | 1.72 |
| Separation Insecurity | 0.83   | 2.45 | 1.83 |
| Withdrawal            | 0.75   | 2.96 | 1.58 |
| Anhedonia             | 0.64   | 2.57 | 1.62 |
| Intimacy Avoidance    | 0.67   | 1.87 | 1.77 |
| Manipulativeness      | 0.85   | 1.13 | 1.58 |
| Deceitfulness         | 0.70   | 1.14 | 1.38 |
| Grandiosity           | 0.61   | 0.84 | 1.20 |
| Irresponsibility      | 0.58   | 1.40 | 1.56 |
| Impulsivity           | 0.79   | 2.35 | 1.76 |
| Distractibility       | 0.82   | 3.74 | 1.71 |
| Perfectionism         | 0.85   | 2.77 | 1.87 |
| Rigidity              | 0.85   | 3.81 | 1.74 |
| Orderliness           | 0.73   | 2.30 | 1.78 |
| Unusual Beliefs       | 0.72   | 1.77 | 1.73 |
| Eccentricity          | 0.72   | 2.18 | 1.74 |
| Perceptual Dysreg.    | 0.76   | 0.85 | 1.29 |
|                       |        | M    | SD   |
| Negative affectivity  | -      | 3.49 | 1.35 |
| Detachment            | -      | 2.47 | 1.26 |
| Antagonism            | -      | 1.04 | 1.16 |
| Disinhibition         | -      | 2.50 | 1.27 |
| Anankastia            | -      | 2.96 | 1.50 |
| Psychoticism          | -      | 1.60 | 1.26 |

Note.  $\rho$  = polychoric correlation coefficient;  $\alpha$  = alpha coefficient; M = mean; SD = standard deviation.
