# Supplementary material
Source: publisher figshare collection journal article supplement (https://karger.figshare.com/articles/dataset/_/12248801)
Supplement: Supplementary file 8 [file 1]

## APPENDIX 12

Six-Factor Loading Pattern for the Modified PID5BF+ in a Spanish Mixed Sample

|                                   | Negative<br>Affectivity | Detachment  | Antagonism  | Disinhibition | Anankastia  | Psychoticism |
|-----------------------------------|-------------------------|-------------|-------------|---------------|-------------|--------------|
| Emotional lability                | <b>0.45</b>             | -0.11       | -0.02       | 0.19          | 0.12        | 0.14         |
| Anxiousness                       | <b>0.78</b>             | 0.17        | 0.00        | -0.03         | 0.05        | 0.06         |
| Separation Insecurity             | <b>0.42</b>             | -0.22       | 0.08        | 0.25          | 0.08        | 0.00         |
| Withdrawal                        | 0.07                    | <b>0.67</b> | 0.02        | 0.02          | 0.07        | 0.12         |
| Anhedonia                         | 0.17                    | <b>0.50</b> | 0.06        | 0.27          | -0.04       | -0.04        |
| Intimacy Avoidance                | 0.01                    | <b>0.49</b> | 0.08        | -0.02         | 0.03        | 0.07         |
| Manipulativeness                  | -0.08                   | 0.09        | <b>0.68</b> | 0.06          | -0.03       | 0.06         |
| Deceitfulness                     | 0.12                    | -0.06       | <b>0.65</b> | 0.10          | 0.03        | 0.03         |
| Grandiosity                       | 0.02                    | 0.11        | <b>0.44</b> | -0.09         | 0.17        | 0.17         |
| Irresponsibility                  | 0.08                    | 0.11        | 0.17        | <b>0.46</b>   | -0.22       | 0.07         |
| Impulsivity                       | 0.16                    | 0.01        | 0.17        | <b>0.48</b>   | 0.02        | 0.10         |
| Distractibility                   | 0.11                    | 0.10        | 0.05        | <b>0.56</b>   | -0.02       | 0.10         |
| Perfectionism                     | 0.03                    | -0.06       | -0.03       | 0.04          | <b>0.68</b> | 0.07         |
| Rigidity                          | 0.15                    | 0.08        | 0.11        | -0.08         | <b>0.62</b> | 0.03         |
| Orderliness                       | 0.12                    | 0.07        | 0.03        | -0.05         | <b>0.67</b> | 0.04         |
| Unusual Beliefs                   | 0.08                    | 0.01        | 0.04        | -0.05         | -0.01       | <b>0.79</b>  |
| Eccentricity                      | -0.01                   | 0.18        | 0.09        | 0.29          | 0.08        | <b>0.46</b>  |
| Perceptual Dysreg.                | 0.01                    | 0.02        | 0.05        | 0.14          | 0.06        | <b>0.44</b>  |
| <b>Latent domain correlations</b> |                         |             |             |               |             |              |
| Negative affectivity              | -                       |             |             |               |             |              |
| Detachment                        | <b>0.15</b>             | -           |             |               |             |              |
| Antagonism                        | <b>0.18</b>             | <b>0.22</b> | -           |               |             |              |
| Disinhibition                     | <b>0.41</b>             | <b>0.19</b> | <b>0.33</b> | -             |             |              |
| Anankastia                        | <b>0.32</b>             | 0.08        | <b>0.13</b> | <b>-0.10</b>  | -           |              |
| Psychoticism                      | <b>0.26</b>             | <b>0.26</b> | <b>0.31</b> | <b>0.21</b>   | <b>0.33</b> | -            |

Note.  $N = 1,431$ ; Expected primary loadings are boldfaced. The matrix at the bottom shows inter-domain correlations, where bolded coefficients are significant at the 0.05 level.

## APPENDIX 12

The Modified PID5BF+ scale score characteristics for a Spanish Mixed Sample

|                       | $\rho$ | Community (n = 1,011) |      | Patients (n = 420) |      |
|-----------------------|--------|-----------------------|------|--------------------|------|
|                       |        | M                     | SD   | M                  | SD   |
| Emotional lability    | 0.61   | 2.90                  | 1.46 | 3.80               | 1.79 |
| Anxiousness           | 0.92   | 2.33                  | 1.77 | 3.84               | 2.04 |
| Separation Insecurity | 0.70   | 1.77                  | 1.32 | 2.28               | 1.74 |
| Withdrawal            | 0.73   | 1.31                  | 1.25 | 2.22               | 1.74 |
| Anhedonia             | 0.77   | 0.94                  | 1.16 | 2.35               | 1.81 |
| Intimacy Avoidance    | 0.60   | 1.14                  | 1.23 | 1.56               | 1.69 |
| Manipulativeness      | 0.79   | 0.61                  | 1.01 | 1.29               | 1.60 |
| Deceitfulness         | 0.74   | 1.50                  | 1.27 | 2.16               | 1.85 |
| Grandiosity           | 0.70   | 0.93                  | 1.15 | 1.12               | 1.45 |
| Irresponsibility      | 0.68   | 1.10                  | 1.17 | 1.64               | 1.63 |
| Impulsivity           | 0.79   | 1.93                  | 1.44 | 2.92               | 1.86 |
| Distractibility       | 0.76   | 2.46                  | 1.53 | 3.52               | 1.89 |
| Perfectionism         | 0.58   | 2.56                  | 1.31 | 2.38               | 1.92 |
| Rigidity              | 0.74   | 2.58                  | 1.47 | 3.12               | 1.81 |
| Orderliness           | 0.74   | 1.83                  | 1.55 | 2.08               | 1.93 |
| Unusual Beliefs       | 0.78   | 1.38                  | 1.48 | 1.94               | 1.92 |
| Eccentricity          | 0.83   | 1.16                  | 1.43 | 2.12               | 1.89 |
| Perceptual Dysreg.    | 0.68   | 0.72                  | 1.06 | 0.93               | 1.39 |
|                       |        | M                     | SD   | M                  | SD   |
| Negative affectivity  | -      | 2.33                  | 1.15 | 3.30               | 1.47 |
| Detachment            | -      | 1.13                  | 0.90 | 2.04               | 1.34 |
| Antagonism            | -      | 1.02                  | 0.91 | 1.52               | 1.23 |
| Disinhibition         | -      | 1.83                  | 1.07 | 2.69               | 1.41 |
| Anankastia            | -      | 2.32                  | 1.16 | 2.53               | 1.60 |
| Psychoticism          | -      | 1.09                  | 1.06 | 1.66               | 1.38 |

Note.  $\rho$  = polychoric correlation coefficient; M = mean; SD = standard deviation.
