# Supplementary material
Source: publisher figshare collection journal article supplement (https://karger.figshare.com/articles/dataset/_/12248801)
Supplement: Supplementary file 9 [file 1]

## APPENDIX 11

Six-Factor Loading Pattern for PID5BF+ in a Portuguese community sample

|                                   | Negative<br>Affectivity | Detachment  | Antagonism  | Disinhibition | Anankastia  | Psychoticism |
|-----------------------------------|-------------------------|-------------|-------------|---------------|-------------|--------------|
| Emotional lability                | <b>0.49</b>             | -0.03       | -0.04       | 0.24          | 0.04        | 0.16         |
| Anxiousness                       | <b>0.60</b>             | 0.18        | -0.03       | 0.03          | 0.20        | 0.02         |
| Separation Insecurity             | <b>0.54</b>             | -0.02       | 0.10        | 0.06          | -0.01       | -0.01        |
| Withdrawal                        | -0.05                   | <b>0.67</b> | 0.02        | 0.06          | 0.11        | 0.08         |
| Anhedonia                         | 0.23                    | <b>0.62</b> | 0.09        | 0.03          | -0.10       | 0.04         |
| Intimacy Avoidance                | -0.02                   | <b>0.44</b> | -0.02       | 0.06          | 0.05        | 0.09         |
| Manipulativeness                  | -0.03                   | 0.08        | <b>0.55</b> | 0.01          | -0.03       | 0.11         |
| Deceitfulness                     | 0.03                    | 0.00        | <b>0.77</b> | 0.07          | 0.04        | 0.05         |
| Grandiosity                       | -0.03                   | 0.02        | <b>0.35</b> | 0.06          | 0.19        | 0.14         |
| Irresponsibility                  | 0.02                    | 0.11        | 0.20        | <b>0.38</b>   | -0.25       | 0.02         |
| Impulsivity                       | 0.04                    | -0.04       | 0.09        | <b>0.57</b>   | 0.08        | -0.01        |
| Distractibility                   | 0.12                    | 0.14        | 0.02        | <b>0.50</b>   | -0.06       | 0.07         |
| Perfectionism                     | 0.18                    | -0.01       | 0.08        | 0.06          | <b>0.62</b> | 0.10         |
| Rigidity                          | 0.05                    | 0.07        | 0.04        | -0.05         | <b>0.67</b> | 0.02         |
| Orderliness                       | 0.14                    | 0.06        | 0.05        | -0.03         | <b>0.57</b> | 0.04         |
| Unusual Beliefs                   | 0.05                    | 0.01        | 0.08        | -0.05         | -0.01       | <b>0.79</b>  |
| Eccentricity                      | -0.08                   | 0.15        | 0.09        | 0.21          | 0.05        | <b>0.50</b>  |
| Perceptual Dysreg.                | 0.08                    | 0.06        | 0.02        | 0.24          | 0.04        | <b>0.37</b>  |
| <b>Latent domain correlations</b> |                         |             |             |               |             |              |
| Negative affectivity              | -                       |             |             |               |             |              |
| Detachment                        | <b>0.22</b>             | -           |             |               |             |              |
| Antagonism                        | <b>0.09</b>             | <b>0.18</b> | -           |               |             |              |
| Disinhibition                     | <b>0.31</b>             | <b>0.27</b> | <b>0.30</b> | -             |             |              |
| Anankastia                        | <b>0.31</b>             | <b>0.11</b> | <b>0.14</b> | -0.03         | -           |              |
| Psychoticism                      | <b>0.18</b>             | <b>0.30</b> | <b>0.34</b> | <b>0.20</b>   | <b>0.34</b> | -            |

Note. *N* = 1,185; Expected primary loadings are boldfaced. The matrix at the bottom shows inter-domain correlations, where bolded coefficients are significant at the 0.05 level.

## APPENDIX 11

The Modified PID5BF+ scale score characteristics for a Portuguese Community Sample

| Community (n = 1,185) |        |      |      |
|-----------------------|--------|------|------|
|                       | $\rho$ | M    | SD   |
| Emotional lability    | 0.70   | 2.56 | 1.66 |
| Anxiousness           | 0.90   | 2.95 | 1.86 |
| Separation Insecurity | 0.74   | 1.88 | 1.57 |
| Withdrawal            | 0.76   | 1.10 | 1.30 |
| Anhedonia             | 0.76   | 1.20 | 1.33 |
| Intimacy Avoidance    | 0.70   | 0.91 | 1.31 |
| Manipulativeness      | 0.83   | 0.58 | 1.05 |
| Deceitfulness         | 0.64   | 1.31 | 1.29 |
| Grandiosity           | 0.65   | 0.87 | 1.21 |
| Irresponsibility      | 0.64   | 0.83 | 1.14 |
| Impulsivity           | 0.74   | 1.80 | 1.41 |
| Distractibility       | 0.68   | 2.57 | 1.56 |
| Perfectionism         | 0.68   | 2.30 | 1.57 |
| Rigidity              | 0.65   | 3.33 | 1.53 |
| Orderliness           | 0.75   | 1.74 | 1.63 |
| Unusual Beliefs       | 0.79   | 1.04 | 1.35 |
| Eccentricity          | 0.83   | 1.08 | 1.38 |
| Perceptual Dysreg.    | 0.71   | 0.71 | 1.08 |
|                       |        | M    | SD   |
| Negative affectivity  | -      | 2.46 | 1.32 |
| Detachment            | -      | 1.07 | 1.01 |
| Antagonism            | -      | 0.92 | 0.91 |
| Disinhibition         | -      | 1.73 | 1.03 |
| Anankastia            | -      | 2.45 | 1.28 |
| Psychoticism          | -      | 0.95 | 1.01 |

Note.  $\rho$  = polychoric correlation coefficient;  $\alpha$  = alpha coefficient; M = mean; SD = standard deviation.
