# Supplementary material
Source: publisher figshare collection journal article supplement (https://karger.figshare.com/articles/dataset/_/12248801)
Supplement: Supplementary file 10 [file 1]

## APPENDIX 4

Six-Factor Modified PID5BF+ Loading Pattern for Brazilian mixed sample with inter-domain correlations

|                                   | Negative<br>Affectivity | Detachment  | Antagonism  | Disinhibition | Anankastia  | Psychoticism |
|-----------------------------------|-------------------------|-------------|-------------|---------------|-------------|--------------|
| Emotional lability                | <b>0.66</b>             | 0.04        | -0.05       | 0.09          | 0.11        | 0.05         |
| Anxiousness                       | <b>0.35</b>             | 0.17        | -0.02       | 0.18          | 0.39        | -0.15        |
| Separation Insecurity             | <b>0.58</b>             | 0.05        | 0.08        | 0.07          | 0.00        | 0.06         |
| Withdrawal                        | -0.01                   | <b>0.77</b> | 0.00        | 0.03          | 0.03        | 0.09         |
| Anhedonia                         | 0.13                    | <b>0.59</b> | 0.06        | 0.13          | -0.03       | 0.02         |
| Intimacy Avoidance                | -0.13                   | <b>0.35</b> | 0.07        | 0.10          | 0.07        | 0.16         |
| Manipulativeness                  | -0.08                   | 0.04        | <b>0.74</b> | 0.07          | -0.01       | 0.08         |
| Deceitfulness                     | 0.06                    | 0.02        | <b>0.76</b> | 0.08          | 0.05        | 0.03         |
| Grandiosity                       | 0.15                    | 0.12        | <b>0.39</b> | 0.00          | 0.13        | 0.17         |
| Irresponsibility                  | 0.13                    | 0.04        | 0.18        | <b>0.29</b>   | -0.21       | 0.17         |
| Impulsivity                       | 0.38                    | 0.07        | 0.13        | <b>0.25</b>   | -0.11       | 0.13         |
| Distractibility                   | -0.04                   | 0.00        | 0.00        | <b>0.85</b>   | 0.01        | -0.01        |
| Perfectionism                     | 0.15                    | 0.02        | 0.04        | 0.00          | <b>0.68</b> | 0.09         |
| Rigidity                          | 0.02                    | 0.14        | 0.11        | -0.04         | <b>0.68</b> | 0.08         |
| Orderliness                       | 0.04                    | 0.05        | 0.02        | 0.01          | <b>0.66</b> | 0.10         |
| Unusual Beliefs                   | 0.10                    | 0.06        | 0.11        | 0.02          | 0.09        | <b>0.61</b>  |
| Eccentricity                      | -0.04                   | 0.16        | 0.03        | 0.15          | 0.04        | <b>0.68</b>  |
| Perceptual Dysreg.                | 0.11                    | 0.05        | 0.10        | 0.14          | 0.02        | <b>0.42</b>  |
| <b>Latent domain correlations</b> |                         |             |             |               |             |              |
| Negative affectivity              | -                       |             |             |               |             |              |
| Detachment                        | <b>0.23</b>             | -           |             |               |             |              |
| Antagonism                        | <b>0.19</b>             | <b>0.24</b> | -           |               |             |              |
| Disinhibition                     | <b>0.36</b>             | <b>0.32</b> | <b>0.28</b> | -             |             |              |
| Anankastia                        | <b>0.27</b>             | <b>0.26</b> | <b>0.13</b> | 0.00          | -           |              |
| Psychoticism                      | <b>0.20</b>             | <b>0.38</b> | <b>0.39</b> | <b>0.19</b>   | <b>0.32</b> | -            |

Note.  $N = 1,281$ ; Expected primary loadings are boldfaced. The matrix at the bottom shows inter-domain correlations, where bolded coefficients are significant at the 0.05 level.

## APPENDIX 4

The Modified PID5BF+ scales characteristics for Brazilian mixed sample

|                       | Patients (n = 103) |      |      | Community (n = 1,178) |      |
|-----------------------|--------------------|------|------|-----------------------|------|
|                       | $\rho$             | M    | SD   | M                     | SD   |
| Emotional lability    | 0.69               | 3.92 | 1.78 | 2.44                  | 1.81 |
| Anxiousness           | 0.93               | 4.43 | 1.75 | 3.42                  | 1.98 |
| Separation Insecurity | 0.77               | 2.89 | 1.89 | 1.57                  | 1.62 |
| Withdrawal            | 0.82               | 2.17 | 1.88 | 1.35                  | 1.49 |
| Anhedonia             | 0.82               | 2.61 | 1.90 | 1.56                  | 1.64 |
| Intimacy Avoidance    | 0.84               | 1.39 | 1.90 | 0.82                  | 1.37 |
| Manipulativeness      | 0.83               | 0.51 | 1.10 | 0.78                  | 1.29 |
| Deceitfulness         | 0.73               | 0.96 | 1.31 | 1.14                  | 1.43 |
| Grandiosity           | 0.74               | 1.34 | 1.54 | 0.86                  | 1.28 |
| Irresponsibility      | 0.62               | 1.31 | 1.59 | 1.04                  | 1.33 |
| Impulsivity           | 0.86               | 2.60 | 1.98 | 1.38                  | 1.55 |
| Distractibility       | 0.74               | 3.04 | 1.74 | 2.60                  | 1.73 |
| Perfectionism         | 0.82               | 2.80 | 2.23 | 1.96                  | 1.73 |
| Rigidity              | 0.73               | 3.19 | 1.80 | 2.51                  | 1.71 |
| Orderliness           | 0.68               | 2.22 | 1.88 | 1.68                  | 1.62 |
| Unusual Beliefs       | 0.81               | 2.04 | 1.97 | 1.22                  | 1.56 |
| Eccentricity          | 0.88               | 1.83 | 1.93 | 1.04                  | 1.52 |
| Perceptual Dysreg.    | 0.77               | 1.08 | 1.57 | 0.52                  | 1.03 |
|                       |                    | M    | SD   | M                     | SD   |
| Negative affectivity  | -                  | 3.75 | 1.32 | 2.48                  | 1.42 |
| Detachment            | -                  | 2.06 | 1.43 | 1.24                  | 1.18 |
| Antagonism            | -                  | 0.94 | 1.04 | 0.92                  | 1.10 |
| Disinhibition         | -                  | 2.32 | 1.35 | 1.67                  | 1.17 |
| Anankastia            | -                  | 2.74 | 1.66 | 2.05                  | 1.43 |
| Psychoticism          | -                  | 1.65 | 1.48 | 0.92                  | 1.13 |

Note.  $\rho$  = polychoric correlation coefficient;  $\alpha$  = alpha coefficient; M = mean; SD = standard deviation.
