# Supplementary material
Source: publisher figshare collection journal article supplement (https://karger.figshare.com/articles/dataset/_/12248801)
Supplement: Supplementary file 11 [file 1]

## APPENDIX 5

Six-Factor Loading Pattern for the Modified PID5BF+ in Czech mixed sample

|                                   | Negative<br>Affectivity | Detachment  | Antagonism  | Disinhibition | Anankastia  | Psychoticism |
|-----------------------------------|-------------------------|-------------|-------------|---------------|-------------|--------------|
| Emotional lability                | <b>0.39</b>             | -0.02       | -0.05       | 0.35          | 0.13        | 0.16         |
| Anxiousness                       | <b>0.88</b>             | 0.12        | 0.04        | -0.04         | 0.02        | 0.06         |
| Separation Insecurity             | <b>0.48</b>             | 0.01        | 0.07        | 0.26          | 0.08        | -0.05        |
| Withdrawal                        | 0.11                    | <b>0.59</b> | 0.06        | -0.02         | 0.10        | 0.04         |
| Anhedonia                         | 0.24                    | <b>0.58</b> | 0.03        | 0.20          | -0.01       | -0.08        |
| Intimacy Avoidance                | -0.08                   | <b>0.65</b> | 0.03        | -0.04         | 0.07        | 0.10         |
| Manipulativeness                  | 0.01                    | 0.05        | <b>0.87</b> | -0.03         | -0.03       | 0.06         |
| Deceitfulness                     | 0.04                    | 0.02        | <b>0.61</b> | 0.16          | 0.10        | 0.01         |
| Grandiosity                       | 0.04                    | 0.01        | <b>0.43</b> | 0.11          | 0.19        | 0.15         |
| Irresponsibility                  | -0.04                   | 0.07        | 0.19        | <b>0.46</b>   | -0.09       | 0.34         |
| Impulsivity                       | 0.02                    | 0.06        | 0.06        | <b>0.74</b>   | 0.06        | 0.04         |
| Distractibility                   | 0.30                    | 0.17        | -0.04       | <b>0.35</b>   | 0.00        | 0.29         |
| Perfectionism                     | -0.05                   | 0.05        | 0.03        | 0.09          | <b>0.85</b> | -0.02        |
| Rigidity                          | 0.11                    | 0.13        | 0.09        | -0.16         | <b>0.43</b> | 0.10         |
| Orderliness                       | 0.17                    | 0.03        | -0.01       | -0.06         | <b>0.58</b> | 0.11         |
| Unusual Beliefs                   | 0.05                    | 0.08        | 0.18        | 0.03          | 0.04        | <b>0.58</b>  |
| Eccentricity                      | 0.08                    | 0.03        | 0.07        | 0.13          | 0.11        | <b>0.65</b>  |
| Perceptual Dysreg.                | 0.11                    | 0.09        | 0.07        | 0.07          | 0.05        | <b>0.44</b>  |
| <b>Latent domain correlations</b> |                         |             |             |               |             |              |
| Negative affectivity              | -                       |             |             |               |             |              |
| Detachment                        | <b>0.35</b>             | -           |             |               |             |              |
| Antagonism                        | <b>0.13</b>             | <b>0.21</b> | -           |               |             |              |
| Disinhibition                     | <b>0.38</b>             | <b>0.21</b> | <b>0.26</b> | -             |             |              |
| Anankastia                        | <b>0.27</b>             | <b>0.25</b> | <b>0.21</b> | <b>0.10</b>   | -           |              |
| Psychoticism                      | <b>0.31</b>             | <b>0.26</b> | <b>0.36</b> | <b>0.41</b>   | <b>0.25</b> | -            |

Note.  $N = 466$ ; Expected primary loadings are boldfaced. The matrix at the bottom shows inter-domain correlations, where bolded coefficients are significant at the 0.05 level.

## APPENDIX 5

### Modified PID5BF+ scales characteristics for Czech mixed sample

|                       | Patients (n = 125) |      |      | Community (n = 341) |      |
|-----------------------|--------------------|------|------|---------------------|------|
|                       | $\rho$             | M    | SD   | M                   | SD   |
| Emotional lability    | 0.81               | 3.06 | 1.90 | 1.55                | 1.54 |
| Anxiousness           | 0.95               | 3.72 | 1.97 | 1.16                | 1.52 |
| Separation Insecurity | 0.81               | 2.70 | 1.81 | 1.16                | 1.43 |
| Withdrawal            | 0.78               | 2.62 | 1.78 | 1.39                | 1.40 |
| Anhedonia             | 0.75               | 2.75 | 1.60 | 1.08                | 1.31 |
| Intimacy Avoidance    | 0.70               | 1.55 | 1.70 | 0.78                | 1.15 |
| Manipulativeness      | 0.82               | 0.94 | 1.35 | 0.64                | 1.11 |
| Deceitfulness         | 0.80               | 1.88 | 1.76 | 1.45                | 1.59 |
| Grandiosity           | 0.73               | 1.03 | 1.48 | 0.80                | 1.19 |
| Irresponsibility      | 0.71               | 1.54 | 1.65 | 0.91                | 1.21 |
| Impulsivity           | 0.74               | 2.62 | 1.82 | 1.60                | 1.46 |
| Distractibility       | 0.72               | 3.05 | 1.71 | 1.59                | 1.54 |
| Perfectionism         | 0.80               | 2.09 | 1.84 | 1.78                | 1.58 |
| Rigidity              | 0.70               | 3.20 | 1.68 | 2.78                | 1.57 |
| Orderliness           | 0.75               | 1.48 | 1.80 | 1.05                | 1.35 |
| Unusual Beliefs       | 0.80               | 2.04 | 1.93 | 1.14                | 1.54 |
| Eccentricity          | 0.82               | 2.11 | 1.86 | 1.30                | 1.55 |
| Perceptual Dysreg.    | 0.79               | 0.90 | 1.33 | 0.56                | 1.01 |
|                       |                    | M    | SD   | M                   | SD   |
| Negative affectivity  | -                  | 3.17 | 1.48 | 1.29                | 1.19 |
| Detachment            | -                  | 2.30 | 1.30 | 1.08                | 1.00 |
| Antagonism            | -                  | 1.32 | 1.32 | 0.97                | 1.08 |
| Disinhibition         | -                  | 2.40 | 1.39 | 1.36                | 1.15 |
| Anankastia            | -                  | 2.28 | 1.48 | 1.87                | 1.18 |
| Psychoticism          | -                  | 1.71 | 1.43 | 1.00                | 1.12 |

Note.  $\rho$  = polychoric correlation coefficient;  $\alpha$  = alpha coefficient; M = mean; SD = standard deviation.
