# Supplementary material
Source: publisher figshare collection journal article supplement (https://karger.figshare.com/articles/dataset/_/12248801)
Supplement: Supplementary file 12 [file 1]

## APPENDIX 7

Six-Factor Loading Pattern for the Modified PID5BF+ in French-speaking (Belgium) community sample

|                                   | Negative<br>Affectivity | Detachment  | Antagonism  | Disinhibition | Anankastia  | Psychoticism |
|-----------------------------------|-------------------------|-------------|-------------|---------------|-------------|--------------|
| Emotional lability                | <b>0.68</b>             | 0.01        | -0.03       | 0.10          | -0.03       | 0.16         |
| Anxiousness                       | <b>0.62</b>             | 0.17        | -0.05       | 0.02          | 0.15        | -0.02        |
| Separation Insecurity             | <b>0.49</b>             | -0.12       | 0.05        | 0.17          | 0.11        | -0.07        |
| Withdrawal                        | 0.06                    | <b>0.75</b> | 0.02        | -0.02         | 0.00        | 0.08         |
| Anhedonia                         | 0.03                    | <b>0.51</b> | 0.04        | 0.17          | 0.04        | 0.00         |
| Intimacy Avoidance                | -0.08                   | <b>0.41</b> | 0.08        | 0.11          | 0.07        | 0.08         |
| Manipulativeness                  | -0.07                   | 0.05        | <b>0.73</b> | 0.02          | 0.01        | 0.07         |
| Deceitfulness                     | 0.05                    | 0.02        | <b>0.68</b> | 0.09          | 0.01        | 0.05         |
| Grandiosity                       | -0.06                   | 0.11        | <b>0.41</b> | 0.01          | 0.17        | 0.15         |
| Irresponsibility                  | 0.02                    | 0.10        | 0.19        | <b>0.35</b>   | -0.17       | 0.06         |
| Impulsivity                       | 0.15                    | -0.08       | 0.16        | <b>0.43</b>   | -0.06       | 0.05         |
| Distractibility                   | 0.08                    | 0.07        | -0.06       | <b>0.61</b>   | 0.00        | 0.03         |
| Perfectionism                     | 0.09                    | 0.02        | 0.03        | 0.02          | <b>0.78</b> | 0.03         |
| Rigidity                          | 0.09                    | 0.09        | 0.08        | -0.08         | <b>0.65</b> | 0.05         |
| Orderliness                       | 0.09                    | 0.05        | 0.01        | -0.08         | <b>0.66</b> | 0.04         |
| Unusual Beliefs                   | 0.05                    | 0.03        | 0.05        | -0.02         | 0.00        | <b>0.82</b>  |
| Eccentricity                      | 0.01                    | 0.11        | 0.07        | 0.26          | 0.05        | <b>0.50</b>  |
| Perceptual Dysreg.                | 0.04                    | 0.04        | 0.05        | 0.21          | 0.07        | <b>0.38</b>  |
| <b>Latent domain correlations</b> |                         |             |             |               |             |              |
| Negative affectivity              | -                       |             |             |               |             |              |
| Detachment                        | <b>0.10</b>             | -           |             |               |             |              |
| Antagonism                        | -0.02                   | <b>0.19</b> | -           |               |             |              |
| Disinhibition                     | <b>0.32</b>             | <b>0.21</b> | <b>0.27</b> | -             |             |              |
| Anankastia                        | <b>0.28</b>             | <b>0.19</b> | <b>0.14</b> | <b>-0.11</b>  | -           |              |
| Psychoticism                      | <b>0.15</b>             | <b>0.28</b> | <b>0.31</b> | <b>0.33</b>   | <b>0.15</b> | -            |

Note.  $N = 1,529$ ; Expected primary loadings are boldfaced. The matrix at the bottom shows inter-domain correlations, where bolded coefficients are significant at the 0.05 level.

## APPENDIX 7

Six-Factor Loading Pattern for French-speaking (Switzerland) community sample

|                                   | Negative<br>Affectivity | Detachment  | Antagonism  | Disinhibition | Anankastia  | Psychoticism |
|-----------------------------------|-------------------------|-------------|-------------|---------------|-------------|--------------|
| Emotional lability                | <b>0.35</b>             | -0.03       | -0.11       | 0.39          | 0.12        | 0.13         |
| Anxiousness                       | <b>0.42</b>             | 0.17        | -0.17       | 0.26          | 0.22        | -0.02        |
| Separation Insecurity             | <b>0.73</b>             | -0.10       | 0.07        | 0.03          | -0.01       | 0.01         |
| Withdrawal                        | -0.09                   | <b>0.72</b> | 0.03        | 0.07          | 0.11        | 0.02         |
| Anhedonia                         | 0.14                    | <b>0.51</b> | 0.06        | 0.10          | -0.05       | 0.01         |
| Intimacy Avoidance                | -0.02                   | <b>0.40</b> | -0.02       | -0.02         | 0.02        | 0.17         |
| Manipulativeness                  | -0.05                   | 0.04        | <b>0.79</b> | 0.03          | 0.05        | 0.04         |
| Deceitfulness                     | 0.15                    | 0.01        | <b>0.63</b> | 0.05          | 0.06        | 0.04         |
| Grandiosity                       | 0.28                    | 0.25        | <b>0.35</b> | -0.22         | 0.04        | 0.15         |
| Irresponsibility                  | 0.09                    | 0.13        | 0.25        | <b>0.20</b>   | -0.33       | 0.05         |
| Impulsivity                       | 0.06                    | -0.14       | 0.26        | <b>0.35</b>   | 0.02        | 0.18         |
| Distractibility                   | 0.09                    | 0.12        | 0.03        | <b>0.64</b>   | -0.11       | 0.03         |
| Perfectionism                     | 0.14                    | 0.02        | 0.06        | -0.06         | <b>0.69</b> | 0.08         |
| Rigidity                          | 0.07                    | 0.12        | 0.10        | -0.03         | <b>0.68</b> | -0.01        |
| Orderliness                       | 0.07                    | 0.09        | -0.02       | 0.06          | <b>0.60</b> | 0.02         |
| Unusual Beliefs                   | 0.05                    | -0.04       | 0.00        | -0.03         | 0.00        | <b>0.77</b>  |
| Eccentricity                      | -0.10                   | 0.08        | 0.16        | 0.30          | 0.02        | <b>0.45</b>  |
| Perceptual Dysreg.                | 0.04                    | 0.14        | -0.04       | 0.12          | 0.02        | <b>0.48</b>  |
| <b>Latent domain correlations</b> |                         |             |             |               |             |              |
| Negative affectivity              | -                       |             |             |               |             |              |
| Detachment                        | <b>0.12</b>             | -           |             |               |             |              |
| Antagonism                        | <b>0.14</b>             | <b>0.16</b> | -           |               |             |              |
| Disinhibition                     | <b>0.32</b>             | <b>0.18</b> | 0.10        | -             |             |              |
| Anankastia                        | <b>0.28</b>             | <b>0.19</b> | 0.04        | -0.04         | -           |              |
| Psychoticism                      | <b>0.16</b>             | <b>0.21</b> | <b>0.24</b> | 0.09          | <b>0.33</b> | -            |

Note.  $N = 494$ ; Expected primary loadings are boldfaced. The matrix at the bottom shows inter-domain correlations, where bolded coefficients are significant at the 0.05 level.

## APPENDIX 7

Six-Factor Loading Pattern for the Modified PID5BF+ in French community sample

|                                   | Negative<br>Affectivity | Detachment  | Antagonism  | Disinhibition | Anankastia  | Psychoticism |
|-----------------------------------|-------------------------|-------------|-------------|---------------|-------------|--------------|
| Emotional lability                | <b>0.61</b>             | -0.01       | -0.01       | 0.18          | -0.02       | 0.04         |
| Anxiousness                       | <b>0.72</b>             | 0.12        | -0.06       | -0.11         | 0.06        | 0.06         |
| Separation Insecurity             | <b>0.55</b>             | -0.12       | 0.05        | 0.12          | 0.13        | -0.05        |
| Withdrawal                        | 0.05                    | <b>0.62</b> | 0.02        | -0.03         | 0.06        | 0.08         |
| Anhedonia                         | 0.00                    | <b>0.58</b> | 0.04        | 0.13          | 0.02        | -0.02        |
| Intimacy Avoidance                | 0.00                    | <b>0.31</b> | 0.10        | 0.08          | -0.05       | 0.03         |
| Manipulativeness                  | -0.04                   | 0.15        | <b>0.72</b> | 0.03          | 0.04        | -0.05        |
| Deceitfulness                     | 0.02                    | -0.04       | <b>0.67</b> | 0.03          | 0.03        | 0.08         |
| Grandiosity                       | -0.13                   | 0.08        | <b>0.37</b> | -0.01         | 0.09        | 0.25         |
| Irresponsibility                  | 0.02                    | -0.08       | 0.35        | <b>0.21</b>   | -0.16       | 0.26         |
| Impulsivity                       | -0.04                   | 0.00        | -0.07       | <b>0.71</b>   | 0.04        | -0.06        |
| Distractibility                   | 0.18                    | 0.10        | -0.02       | <b>0.24</b>   | -0.12       | 0.37         |
| Perfectionism                     | 0.14                    | 0.05        | 0.12        | 0.01          | <b>0.70</b> | 0.00         |
| Rigidity                          | -0.02                   | -0.01       | 0.09        | 0.07          | <b>0.74</b> | -0.04        |
| Orderliness                       | 0.07                    | 0.05        | -0.11       | -0.16         | <b>0.74</b> | 0.08         |
| Unusual Beliefs                   | -0.02                   | 0.16        | 0.14        | 0.14          | 0.04        | <b>0.39</b>  |
| Eccentricity                      | 0.04                    | 0.31        | 0.05        | 0.05          | -0.02       | <b>0.51</b>  |
| Perceptual Dysreg.                | 0.02                    | -0.07       | -0.04       | 0.06          | 0.10        | <b>0.56</b>  |
| <b>Latent domain correlations</b> |                         |             |             |               |             |              |
| Negative affectivity              | -                       |             |             |               |             |              |
| Detachment                        | 0.07                    | -           |             |               |             |              |
| Antagonism                        | -0.07                   | <b>0.19</b> | -           |               |             |              |
| Disinhibition                     | 0.15                    | 0.13        | <b>0.19</b> | -             |             |              |
| Anankastia                        | <b>0.18</b>             | 0.09        | 0.08        | -0.10         | -           |              |
| Psychoticism                      | <b>0.13</b>             | <b>0.31</b> | <b>0.26</b> | 0.02          | <b>0.27</b> | -            |

Note.  $N = 371$ ; Expected primary loadings are boldfaced. The matrix at the bottom shows inter-domain correlations, where bolded coefficients are significant at the 0.05 level.

## APPENDIX 7

Modified PID5BF+ scale characteristics for three French-speaking community samples

|                       | France (n = 371) |      |      | Belgium (n = 1,529) |      |      | Switzerland (n = 494) |      |      |
|-----------------------|------------------|------|------|---------------------|------|------|-----------------------|------|------|
|                       | $\rho$           | M    | SD   | $\rho$              | M    | SD   | $\rho$                | M    | SD   |
| Emotional lability    | 0.67             | 2.48 | 1.64 | 0.82                | 2.65 | 1.81 | 0.82                  | 2.19 | 1.76 |
| Anxiousness           | 0.88             | 2.64 | 1.80 | 0.91                | 2.79 | 1.82 | 0.89                  | 2.17 | 1.78 |
| Separation Insecurity | 0.76             | 2.36 | 1.73 | 0.77                | 2.30 | 1.64 | 0.68                  | 1.75 | 1.51 |
| Withdrawal            | 0.72             | 1.31 | 1.27 | 0.75                | 1.47 | 1.37 | 0.70                  | 1.21 | 1.25 |
| Anhedonia             | 0.53             | 1.14 | 1.18 | 0.67                | 1.14 | 1.29 | 0.61                  | 0.89 | 1.13 |
| Intimacy Avoidance    | 0.75             | 1.08 | 1.38 | 0.75                | 1.17 | 1.43 | 0.71                  | 1.04 | 1.36 |
| Manipulativeness      | 0.77             | 1.00 | 1.33 | 0.84                | 1.31 | 1.50 | 0.81                  | 1.16 | 1.40 |
| Deceitfulness         | 0.61             | 1.63 | 1.35 | 0.67                | 1.96 | 1.44 | 0.68                  | 1.83 | 1.41 |
| Grandiosity           | 0.38             | 0.43 | 0.76 | 0.72                | 0.83 | 1.11 | 0.73                  | 0.79 | 1.12 |
| Irresponsibility      | 0.54             | 0.99 | 1.16 | 0.59                | 1.32 | 1.40 | 0.60                  | 1.27 | 1.40 |
| Impulsivity           | 0.67             | 2.18 | 1.42 | 0.69                | 2.16 | 1.51 | 0.71                  | 1.87 | 1.45 |
| Distractibility       | 0.68             | 3.14 | 1.55 | 0.68                | 2.83 | 1.58 | 0.68                  | 2.45 | 1.58 |
| Perfectionism         | 0.78             | 1.70 | 1.55 | 0.86                | 2.10 | 1.74 | 0.80                  | 1.77 | 1.62 |
| Rigidity              | 0.71             | 2.26 | 1.50 | 0.72                | 2.66 | 1.57 | 0.70                  | 2.63 | 1.55 |
| Orderliness           | 0.79             | 1.60 | 1.68 | 0.73                | 1.73 | 1.60 | 0.69                  | 1.50 | 1.53 |
| Unusual Beliefs       | 0.61             | 0.99 | 1.24 | 0.79                | 1.19 | 1.54 | 0.71                  | 1.14 | 1.46 |
| Eccentricity          | 0.83             | 1.27 | 1.54 | 0.82                | 1.40 | 1.59 | 0.78                  | 1.05 | 1.37 |
| Perceptual Dysreg.    | 0.72             | 1.03 | 1.33 | 0.74                | 1.06 | 1.37 | 0.71                  | 0.72 | 1.15 |
|                       |                  | M    | SD   |                     | M    | SD   |                       | M    | SD   |
| Negative affectivity  | -                | 2.49 | 1.34 | -                   | 2.58 | 1.38 | -                     | 2.04 | 1.30 |
| Detachment            | -                | 1.18 | 0.92 | -                   | 1.26 | 1.04 | -                     | 1.05 | 0.92 |
| Antagonism            | -                | 1.02 | 0.91 | -                   | 1.37 | 1.08 | -                     | 1.26 | 1.03 |
| Disinhibition         | -                | 2.10 | 0.96 | -                   | 2.10 | 1.09 | -                     | 1.86 | 1.06 |
| Anankastia            | -                | 1.85 | 1.32 | -                   | 2.16 | 1.38 | -                     | 1.97 | 1.28 |
| Psychoticism          | -                | 1.10 | 1.03 | -                   | 1.22 | 1.20 | -                     | 0.97 | 1.03 |

Note.  $\rho$  = polychoric correlation coefficient; M = mean; SD = standard deviation.
