# Supplementary material
Source: publisher figshare collection journal article supplement (https://karger.figshare.com/articles/dataset/_/12248801)
Supplement: Supplementary file 13 [file 1]

## APPENDIX 10

Six-Factor Loading Pattern for the Modified PID5BF+ in a Polish mixed sample

|                                   | Negative<br>Affectivity | Detachment  | Antagonism  | Disinhibition | Anankastia  | Psychoticism |
|-----------------------------------|-------------------------|-------------|-------------|---------------|-------------|--------------|
| Emotional lability                | <b>0.83</b>             | -0.05       | 0.07        | 0.03          | -0.03       | 0.17         |
| Anxiousness                       | <b>0.62</b>             | 0.28        | -0.14       | 0.09          | 0.11        | -0.10        |
| Separation Insecurity             | <b>0.37</b>             | -0.12       | 0.05        | 0.25          | 0.20        | -0.16        |
| Withdrawal                        | 0.08                    | <b>0.66</b> | 0.03        | -0.01         | -0.02       | 0.16         |
| Anhedonia                         | -0.13                   | <b>0.48</b> | 0.03        | 0.15          | 0.08        | -0.08        |
| Intimacy Avoidance                | 0.03                    | <b>0.47</b> | 0.06        | 0.05          | 0.06        | 0.01         |
| Manipulativeness                  | 0.00                    | 0.05        | <b>0.79</b> | 0.01          | -0.06       | 0.13         |
| Deceitfulness                     | 0.01                    | 0.00        | <b>0.58</b> | 0.18          | 0.05        | -0.07        |
| Grandiosity                       | -0.01                   | -0.02       | <b>0.44</b> | 0.09          | 0.26        | 0.09         |
| Irresponsibility                  | -0.06                   | 0.04        | 0.10        | <b>0.59</b>   | -0.10       | 0.07         |
| Impulsivity                       | 0.18                    | 0.02        | 0.16        | <b>0.32</b>   | -0.11       | 0.23         |
| Distractibility                   | 0.18                    | 0.11        | -0.04       | <b>0.46</b>   | -0.02       | 0.12         |
| Perfectionism                     | 0.11                    | 0.04        | 0.07        | 0.03          | <b>0.60</b> | 0.10         |
| Rigidity                          | -0.02                   | 0.07        | 0.02        | -0.03         | <b>0.64</b> | 0.06         |
| Orderliness                       | 0.08                    | 0.04        | -0.03       | -0.06         | <b>0.66</b> | 0.07         |
| Unusual Beliefs                   | 0.10                    | -0.01       | 0.07        | 0.13          | 0.11        | <b>0.51</b>  |
| Eccentricity                      | 0.03                    | 0.13        | 0.09        | 0.07          | 0.04        | <b>0.63</b>  |
| Perceptual Dysreg.                | 0.02                    | -0.01       | -0.01       | 0.27          | 0.13        | <b>0.31</b>  |
| <b>Latent domain correlations</b> |                         |             |             |               |             |              |
| Negative affectivity              | -                       |             |             |               |             |              |
| Detachment                        | <b>0.12</b>             | -           |             |               |             |              |
| Antagonism                        | 0.02                    | <b>0.07</b> | -           |               |             |              |
| Disinhibition                     | <b>0.32</b>             | <b>0.20</b> | <b>0.32</b> | -             |             |              |
| Anankastia                        | <b>0.22</b>             | <b>0.15</b> | <b>0.11</b> | 0.04          | -           |              |
| Psychoticism                      | <b>0.21</b>             | <b>0.19</b> | <b>0.30</b> | <b>0.36</b>   | <b>0.18</b> | -            |

Note.  $N = 1,088$ ; Expected primary loadings are boldfaced. The matrix at the bottom shows inter-domain correlations, where bolded coefficients are significant at the 0.05 level.

## APPENDIX 10

The Modified PID5BF+ scale score characteristics for a Polish mixed sample

|                       | Patients (n = 117) |      |      | Community (n = 971) |      |
|-----------------------|--------------------|------|------|---------------------|------|
|                       | $\rho$             | M    | SD   | M                   | SD   |
| Emotional lability    | 0.75               | 3.96 | 1.78 | 2.65                | 1.66 |
| Anxiousness           | 0.92               | 3.87 | 1.91 | 2.52                | 1.92 |
| Separation Insecurity | 0.62               | 3.16 | 1.89 | 2.43                | 1.54 |
| Withdrawal            | 0.72               | 2.81 | 1.67 | 1.83                | 1.43 |
| Anhedonia             | 0.35               | 1.78 | 1.54 | 1.44                | 1.20 |
| Intimacy Avoidance    | 0.52               | 2.28 | 1.69 | 1.40                | 1.43 |
| Manipulativeness      | 0.84               | 1.77 | 1.71 | 1.23                | 1.42 |
| Deceitfulness         | 0.82               | 2.66 | 1.76 | 2.51                | 1.58 |
| Grandiosity           | 0.64               | 1.63 | 1.73 | 1.57                | 1.36 |
| Irresponsibility      | 0.52               | 2.40 | 1.94 | 1.59                | 1.47 |
| Impulsivity           | 0.74               | 3.08 | 1.79 | 1.87                | 1.50 |
| Distractibility       | 0.66               | 3.43 | 1.74 | 2.48                | 1.49 |
| Perfectionism         | 0.77               | 2.59 | 1.86 | 1.94                | 1.51 |
| Rigidity              | 0.72               | 3.09 | 1.74 | 2.92                | 1.56 |
| Orderliness           | 0.68               | 1.60 | 1.69 | 1.71                | 1.55 |
| Unusual Beliefs       | 0.73               | 2.12 | 2.00 | 1.71                | 1.56 |
| Eccentricity          | 0.77               | 2.48 | 1.86 | 1.68                | 1.57 |
| Perceptual Dysreg.    | 0.75               | 0.87 | 1.26 | 0.76                | 1.15 |
|                       |                    | M    | SD   | M                   | SD   |
| Negative affectivity  | -                  | 3.66 | 1.53 | 2.53                | 1.31 |
| Detachment            | -                  | 2.29 | 1.22 | 1.56                | 0.99 |
| Antagonism            | -                  | 2.02 | 1.39 | 1.77                | 1.15 |
| Disinhibition         | -                  | 2.96 | 1.33 | 1.98                | 1.11 |
| Anankastia            | -                  | 2.42 | 1.40 | 2.19                | 1.24 |
| Psychoticism          | -                  | 1.81 | 1.37 | 1.38                | 1.11 |

Note.  $\rho$  = polychoric correlation coefficient;  $\alpha$  = alpha coefficient; M = mean; SD = standard deviation.
