# Supplementary material
Source: publisher figshare collection journal article supplement (https://karger.figshare.com/articles/dataset/_/12248801)
Supplement: Supplementary file 14 [file 1]

### APPENDIX 3

Modified PID5BF+ scale characteristics for U.S. Sample (Anderson et al. 2013)

| U. S. Students (n = 605) |        |      |      |
|--------------------------|--------|------|------|
|                          | $\rho$ | M    | SD   |
| Emotional lability       | 0.74   | 1.78 | 1.61 |
| Anxiousness              | 0.95   | 2.30 | 2.01 |
| Separation Insecurity    | 0.61   | 1.66 | 1.49 |
| Withdrawal               | 0.74   | 0.89 | 1.18 |
| Anhedonia                | 0.68   | 1.08 | 1.28 |
| Intimacy Avoidance       | 0.66   | 0.90 | 1.19 |
| Manipulativeness         | 0.78   | 1.22 | 1.47 |
| Deceitfulness            | 0.79   | 2.16 | 1.67 |
| Grandiosity              | 0.63   | 1.14 | 1.29 |
| Irresponsibility         | 0.64   | 0.94 | 1.20 |
| Impulsivity              | 0.76   | 1.53 | 1.46 |
| Distractibility          | 0.69   | 3.13 | 1.62 |
| Perfectionism            | 0.77   | 2.06 | 1.64 |
| Rigidity                 | 0.65   | 2.54 | 1.53 |
| Orderliness              | 0.78   | 1.80 | 1.63 |
| Unusual Beliefs          | 0.69   | 1.54 | 1.57 |
| Eccentricity             | 0.82   | 1.64 | 1.63 |
| Perceptual Dysreg.       | 0.79   | 0.82 | 1.19 |
|                          |        | M    | SD   |
| Negative affectivity     | -      | 1.92 | 1.33 |
| Detachment               | -      | 0.96 | 0.92 |
| Antagonism               | -      | 1.51 | 1.21 |
| Disinhibition            | -      | 1.86 | 1.07 |
| Anankastia               | -      | 2.13 | 1.37 |
| Psychoticism             | -      | 1.33 | 1.16 |

Note.  $\rho$  = polychoric correlation coefficient;  $\alpha$  = alpha coefficient; M = mean; SD = standard deviation.
